# Supplementary material
Source: publisher figshare collection journal article supplement (https://geolsoc.figshare.com/ndownloader/files/29155607)
Supplement: Supplementary file 1 [file 29155607]

## Sheet: Sheet1
Table S1. Major and trace elements of the Gypsum King sequence.
depth	LOI	Na2O	MgO	Al2O3	SiO2	P2O5	SO3	Cl	K2O	CaO	TiO2	MnO	Fe2O3	NiO	CuO	ZnO	Rb2O	SrO	Y2O3	ZrO2
3	5.86	2.38617	1.8327	19.2824	57.3677	0.155488	0.447949	0.0305119	1.25637	3.93236	0.78103	0.125732	6.65519	0.00784053	0.00916303	0.00812392	0.00377857	0.0784998	0.00255053	0.0155866
18	7.07	2.19024	1.87624	18.649	57.8223	0.155505	0.188007	0.0398803	1.34388	3.19173	0.807974	0.0500606	6.88445	0.00607078	0.00961985	0.0110208	0.00495002	0.0695804	0.00289529	0.0169982
28	7.67	1.82333	2.28985	18.7087	56.6648	0.158074	0.338717	0.0365929	1.70956	2.38625	0.889747	0.0563754	7.58858	0.00575828	0.00761579	0.0190395	0.00668704	0.055168	0.00297202	0.0198754
39	7.05	1.83491	2.40426	18.8157	56.1475	0.19953	0.95823	0.0512837	1.63725	2.94017	0.881258	0.0605316	7.24847	0.00822034	0.00952812	0.0111161	0.00523113	0.059037	0.00233532	0.024661
47	9.52	1.54756	2.37864	19.3964	54.355	0.163166	0.874447	0.0425491	1.61869	2.23273	0.8739	0.0835459	7.54424	0.00730456	0.00922201	0.0108655	0.00639149	0.0478449	0.00328705	0.0194484
56	7.45	2.05909	2.23471	18.5313	56.4579	0.185946	0.374498	0.0268961	1.67538	3.0844	0.946111	0.110749	7.16703	0.0066077	0.00837596	0.0110749	0.00530477	0.0657048	0.00316425	0.0215914
59	6.66	1.91945	2.30516	18.5565	57.5238	0.163978	0.367239	0.0349707	1.50712	3.04048	0.882518	0.110631	7.14415	0.00600034	0.0098443	0.0102193	0.00384397	0.0694727	0.00309392	0.02297
69	4.3	2.12166	2.14755	18.3303	58.005	0.215052	0.69923	0.0331734	1.71073	4.41312	0.850428	0.0800572	7.04551	0.00843717	0.00651963	0.0106423	0.00488972	0.0877274	0.00220517	0.0235857
76	10.4	1.81249	2.19048	17.8859	54.1391	0.246376	1.20987	0.0508151	1.48224	3.22934	0.859055	0.0824273	7.20342	0.00652172	0.00806157	0.010779	0.00534419	0.0619563	0.00298912	0.0212862
89	9.82	1.59396	2.15287	17.8463	53.623	0.351208	1.84874	0.0452555	1.56346	4.01299	0.875881	0.104807	6.83951	0.00628296	0.0100163	0.0122928	0.00573662	0.0556361	0.0036423	0.0212164
97	9.25	2.08849	2.01709	15.2422	50.6335	0.429286	1.03944	0.0240729	1.79751	9.55028	0.906809	0.311941	7.22518	0.00659031	0.00631572	0.0102516	0.00613265	0.0618757	0.0022883	0.0332262
106	8.35	2.33169	2.10825	16.1577	53.3099	0.232763	0.181541	0.0233502	1.89921	7.42913	1.01559	0.160498	7.19083	0.00627593	0.00590676	0.0093216	0.00655281	0.0607289	0.00212274	0.0392246
116	9.54	1.71781	2.4758	17.3479	52.6935	0.160945	1.21891	0.0296694	1.89063	5.23442	0.900672	0.138123	7.29384	0.00693808	0.00894647	0.0125981	0.00584259	0.0504837	0.00219097	0.0170713
120	10.8	1.68555	2.22652	18.4335	53.5807	0.166876	0.516873	0.0205774	1.75378	3.32551	0.908205	0.102436	7.34344	0.0071299	0.00875444	0.0126353	0.00667865	0.0446747	0.00315882	0.0228337
129	10.6	1.83995	2.2414	17.4164	52.8184	0.211934	0.900266	0.0148281	1.85415	4.86607	0.921604	0.128299	7.00502	0.005877	0.00976486	0.0129294	0.00660032	0.0392403	0.0035262	0.0149185
143	8.66	1.94799	2.25178	18.2175	55.7741	0.195195	0.26799	0.0114117	1.97109	2.84675	0.954439	0.105282	7.32215	0.00662613	0.0103993	0.0139885	0.00671816	0.0384684	0.00349713	0.0207067
155	8.35	1.95513	2.05536	17.1763	50.1592	0.492291	0.387261	0.0250114	1.68702	10.0023	0.787905	0.417995	6.8905	0.00618363	0.0109829	0.0110752	0.00590675	0.0514995	0.00470694	0.0191969
165	8.51	2.08726	2.12477	19.132	54.9908	0.187723	0.340888	0.0222098	2.02708	3.16706	0.893183	0.114274	6.88872	0.00562156	0.00921567	0.0130863	0.00626666	0.0378764	0.0034098	0.0238686
173	11.3	1.90762	2.19567	18.2631	54.0559	0.174302	0.5265	0.0107816	1.82074	2.47392	0.882831	0.101706	7.25205	0.00548063	0.00916434	0.0135668	0.00601971	0.0426771	0.00278524	0.0201256
